# Supplementary material for: Advancing Cardiorespiratory Physiotherapy Practice in a Developing Country: Surveying and Benchmarking
Source: Hindawi journal article supplement (doi:10.1155/2019/7682952), 2019-12-15
Supplement: f1 [file 7682952.f1.pdf]

**Appendix 1: Search terms used to identify literature relevant for the description of cardiorespiratory physiotherapy**

The following terms were used interchangeably

|                                               |                 |
|-----------------------------------------------|-----------------|
| Cardiorespiratory physiotherapy               | Practice        |
| Cardiorespiratory Physical therapy            | Service         |
| Respiratory physiotherapy                     | Survey          |
| Respiratory physical therapy                  | Description     |
| Cardiovascular and pulmonary physiotherapy    | Characteristics |
| Cardiovascular and pulmonary physical therapy | Guidelines      |
| Cardiopulmonary physiotherapy                 | Policies        |
| Cardiopulmonary Physical therapy              | Regulations     |
|                                               | Speciality      |
